# Supplementary material
Source: PubMed Central journal article supplement (PMC4688061)

**Figure S6**

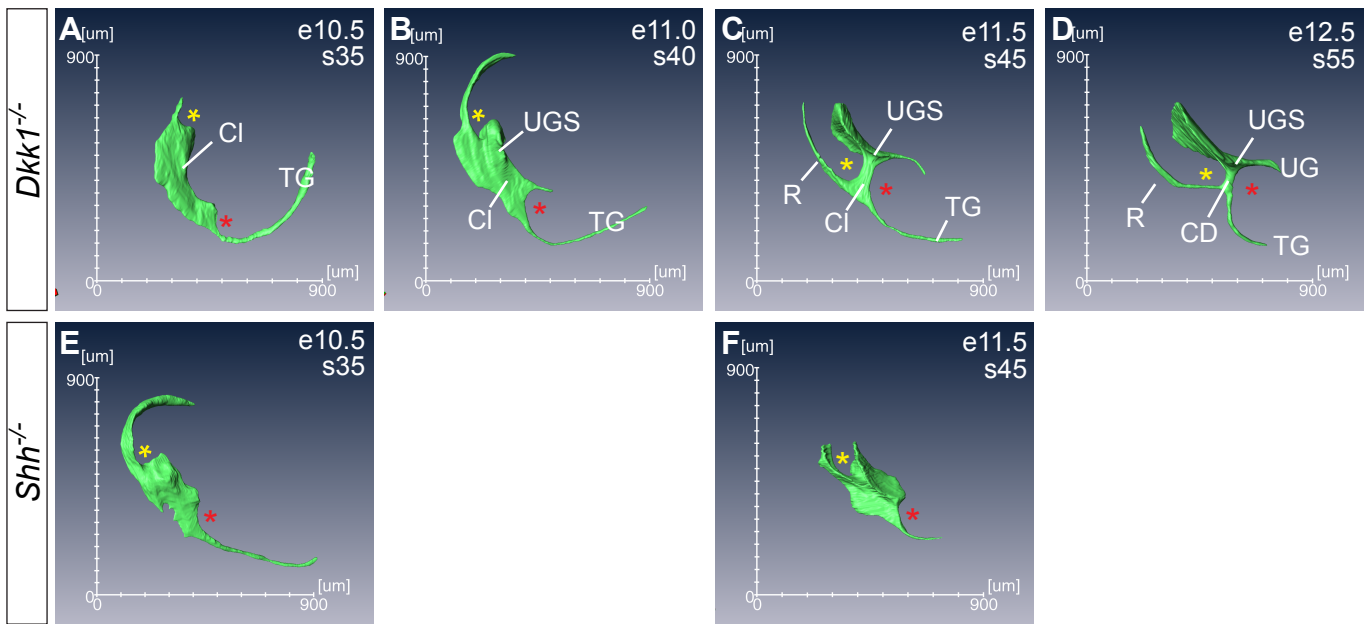

Supplement: NIHMS734311-supplement-6.pdf [file NIHMS734311-supplement-6.pdf]

Figure S7

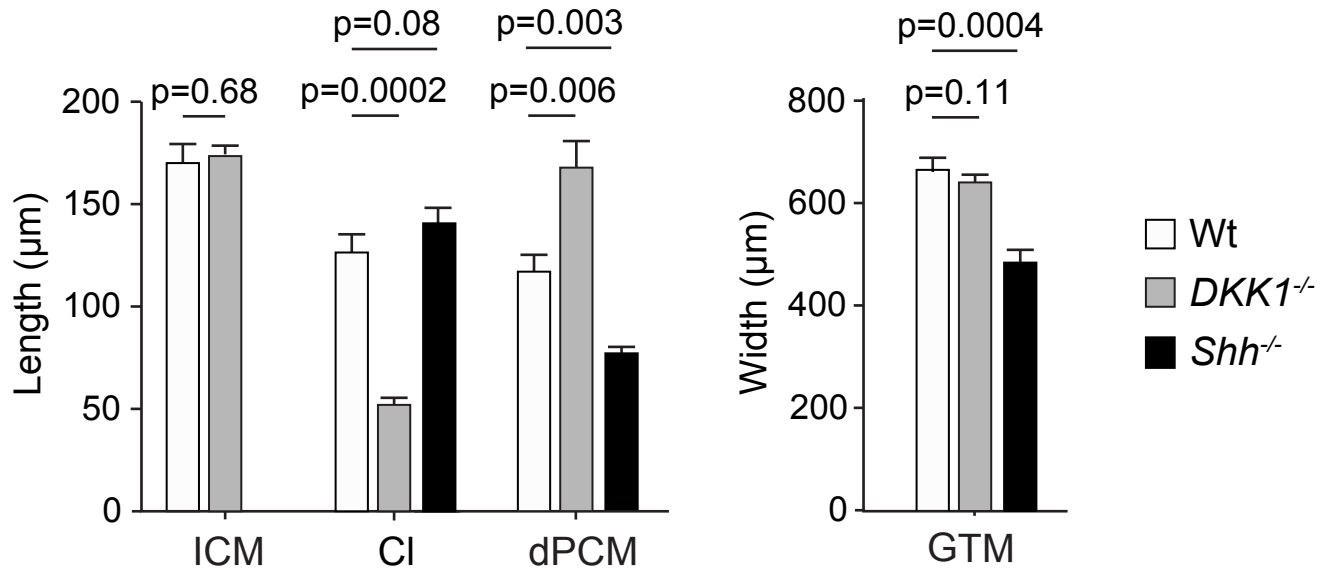

Supplement: NIHMS734311-supplement-7.pdf [file NIHMS734311-supplement-7.pdf]
